# Supplementary material for: Direct in situ photolithography of ultra-stable CsPbBr3 quantum dot arrays based on crosslinking polymerization
Source: Royal Society of Chemistry journal article supplement (doi:10.1039/d3nr04876d), 2023-12-25
Supplement: d3nr04876d1.pdf [file d3nr04876d1.pdf]

## Supporting Information

### Direct in situ photolithography of ultra-stable CsPbBr<sub>3</sub> quantum dot arrays based on crosslinking polymerization

Yanli Wan<sup>1</sup>, Yixing Zhao<sup>1</sup>, Yaling Li, Zhenwei Zhang, Sen Li, Tingfang Tian\*,  
Li Wang\*

School of Physics and Materials Science, Nanchang University, Nanchang 330031

#### Figures

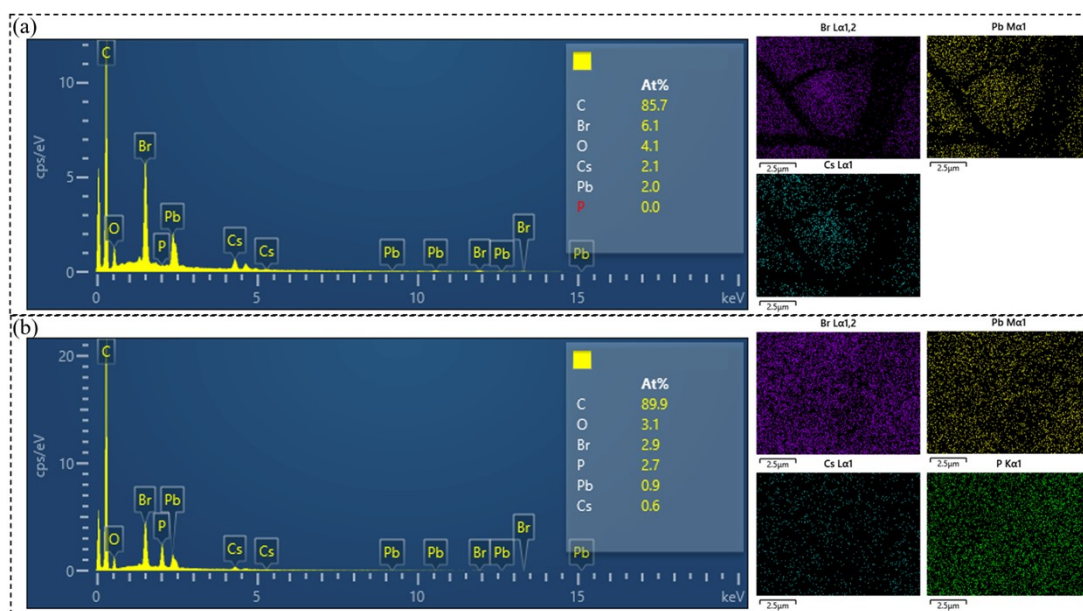

Figure S1 The EDS of the (a) pristine and (b) XBPO-treated CsPbBr<sub>3</sub> PQDs

<sup>1</sup> These people contribute equal to this work.

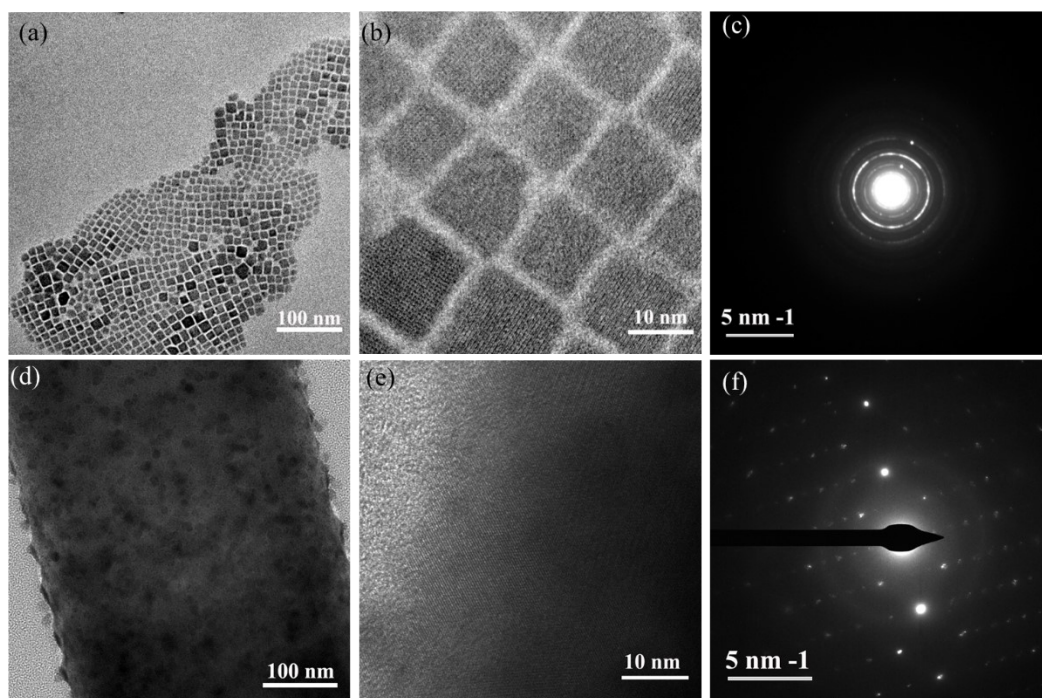

Figure S2 (a) and (b) TEM micrographs and (c) high-resolution diffraction patterns of CsPbI<sub>3</sub> PQDs treated with XBPO after aged for a week; (d) and (e) TEM and (f) high-resolution diffraction patterns of traditional CsPbI<sub>3</sub> PQDs after one week of aging.

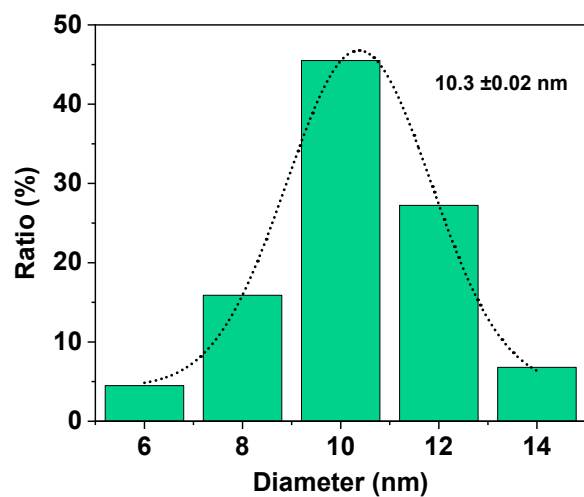

Figure S3. Size distribution of the XBPO-treated CsPbI<sub>3</sub> PQDs

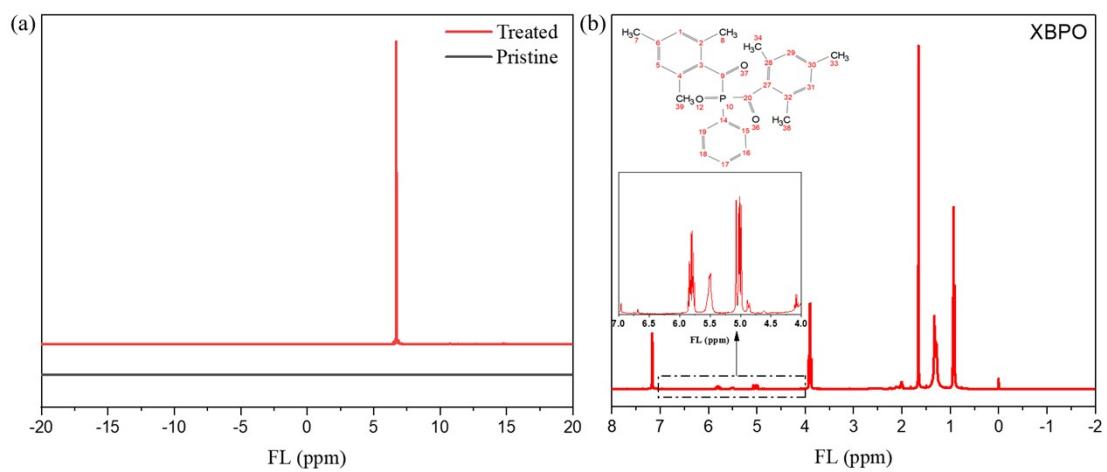

Figure S4. (a)  $^{31}\text{P}$  NMR spectrum of the Pristine and XBPO treated PQDs; (b)  $^1\text{H}$  NMR spectra of phenyl phosphorus dioxide XBPO

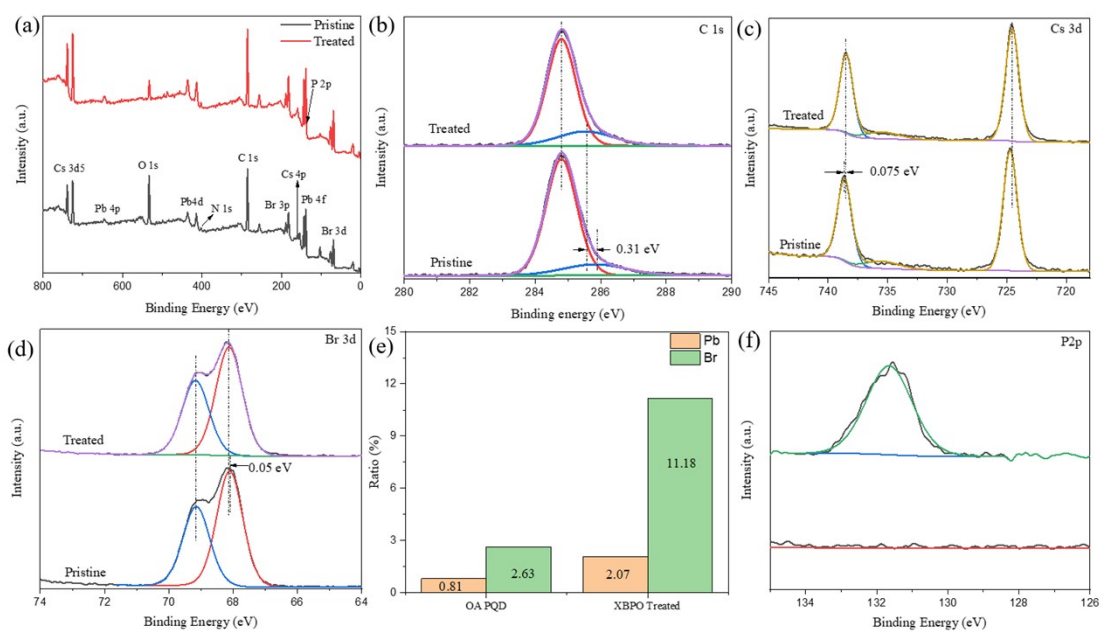

Figure S5. XPS spectra of XBPO treated and Pristine PQDs. Full XPS spectra of (a) Pristine and XBPO treated PQDs; high-resolution XPS spectra of (b) C 1s, (c) Cs 3d, (d) Br 3d, (e) the Br/Pb atomic ratio (f) P2p of the CsPbBr<sub>3</sub> PQDs.

## Tables

**Table S1.** The optical properties of CsPbBr<sub>3</sub> QDs

|          | PL (nm) | FWHM (nm) | PLQY (%) | $\tau_1$ (ns) | $B_1$ (%) | $\tau_2$ (ns) | $B_2$ (%) | $\tau_{\text{int}}$ (ns) | $\chi^2$ |
|----------|---------|-----------|----------|---------------|-----------|---------------|-----------|--------------------------|----------|
| Pristine | 513     | 21        | 66.7     | 7.43          | 63.80     | 16.33         | 36.12     | 10.65                    | 1.34     |
| Treated  | 517     | 17        | 99.5     | 21.22         | 75.52     | 58.22         | 24.48     | 30.28                    | 1.02     |

$B_i$  is the pre-exponential factor in the model function for exponential component analysis.

$\chi^2$  is the reduced chi-square value of the decay fitting.

$\tau_{\text{int}}$  is the average lifetime.  $\tau_{\text{int}} = \sum B_i \cdot \tau_i$

**Table S2.** The optical properties of CsPbI<sub>3</sub> QDs

|          | PL (nm) | FWHM (nm) | PLQY (%) | $\tau_1$ (ns) | $B_1$ (%) | $\tau_2$ (ns) | $B_2$ (%) | $\tau_{\text{int}}$ (ns) | $\chi^2$ |
|----------|---------|-----------|----------|---------------|-----------|---------------|-----------|--------------------------|----------|
| Pristine | 662     | 49        | 44.5     | 5.28          | 32.76     | 13.86         | 67.24     | 11.05                    | 1.14     |
| Treated  | 687     | 45        | 91.7     | 25.88         | 47.08     | 134.19        | 52.92     | 83.10                    | 1.00     |

$B_i$  is the pre-exponential factor in the model function for exponential component analysis.

$\chi^2$  is the reduced chi-square value of the decay fitting.

$\tau_{\text{int}}$  is the average lifetime.  $\tau_{\text{int}} = \sum B_i \cdot \tau_i$

**Table S3.** The optical properties of CsPbI<sub>3</sub> QDs after 3 months

|         | PLQY (%) | $\tau_1$ (ns) | $B_1$ (%) | $\tau_2$ (ns) | $B_2$ (%) | $\tau_{\text{int}}$ (ns) | $\chi^2$ |
|---------|----------|---------------|-----------|---------------|-----------|--------------------------|----------|
| Treated | 70.5     | 25.42         | 47.78     | 96.59         | 52.22     | 62.59                    | 1.19     |

$B_i$  is the pre-exponential factor in the model function for exponential component analysis.

$\chi^2$  is the reduced chi-square value of the decay fitting.

$\tau_{\text{int}}$  is the average lifetime.  $\tau_{\text{int}} = \sum B_i \cdot \tau_i$
